# Supplementary material for: Aneurysm-on-a-Chip: Setting Flow Parameters for Microfluidic Endothelial Cultures Based on Computational Fluid Dynamics Modeling of Intracranial Aneurysms
Source: Brain Sci. 2022 May 5;12(5):603. doi: 10.3390/brainsci12050603 (PMC9139202; doi:10.3390/brainsci12050603)
Supplement: Supplementary file 1 [file brainsci-12-00603-s001.zip › Supplementary file S1 - 3D file of the microchannel mold.STEP]

ISO-10303-21;
HEADER;
FILE_DESCRIPTION (( 'STEP AP214' ),
    '1' );
FILE_NAME ('2018-08-03 device mold channels 100�m.STEP',
    '2022-04-11T18:50:36',
    ( '' ),
    ( '' ),
    'SwSTEP 2.0',
    'SolidWorks 2019',
    '' );
FILE_SCHEMA (( 'AUTOMOTIVE_DESIGN' ));
ENDSEC;

DATA;
#1 = EDGE_CURVE ( 'NONE', #214, #305, #501, .T. ) ;
#2 = VECTOR ( 'NONE', #193, 1000.000000000000000 ) ;
#3 = ORIENTED_EDGE ( 'NONE', *, *, #232, .T. ) ;
#4 = AXIS2_PLACEMENT_3D ( 'NONE', #385, #141, #686 ) ;
#5 = LINE ( 'NONE', #182, #745 ) ;
#6 = DIRECTION ( 'NONE',  ( -0.000000000000000000, -1.000000000000000000, -0.000000000000000000 ) ) ;
#7 = EDGE_CURVE ( 'NONE', #742, #601, #452, .T. ) ;
#8 = DIRECTION ( 'NONE',  ( 0.000000000000000000, 0.000000000000000000, 1.000000000000000000 ) ) ;
#9 = EDGE_LOOP ( 'NONE', ( #701, #656, #778, #499 ) ) ;
#10 = UNCERTAINTY_MEASURE_WITH_UNIT (LENGTH_MEASURE( 1.000000000000000082E-05 ), #767, 'distance_accuracy_value', 'NONE');
#11 = VERTEX_POINT ( 'NONE', #307 ) ;
#12 = DIRECTION ( 'NONE',  ( 1.779203565104417621E-16, 0.000000000000000000, 1.000000000000000000 ) ) ;
#13 = EDGE_CURVE ( 'NONE', #511, #15, #388, .T. ) ;
#14 = FACE_BOUND ( 'NONE', #9, .T. ) ;
#15 = VERTEX_POINT ( 'NONE', #620 ) ;
#16 = VERTEX_POINT ( 'NONE', #678 ) ;
#17 = CARTESIAN_POINT ( 'NONE',  ( 57.78428093645484864, 8.099999999999999645, 10.31635451505017009 ) ) ;
#18 = CARTESIAN_POINT ( 'NONE',  ( 4.784280936454847755, 8.099999999999999645, -4.593645484949830049 ) ) ;
#19 = EDGE_LOOP ( 'NONE', ( #486, #444, #506, #300 ) ) ;
#20 = CARTESIAN_POINT ( 'NONE',  ( 57.78428093645484864, 8.000000000000000000, -4.593645484949830049 ) ) ;
#21 = CARTESIAN_POINT ( 'NONE',  ( 4.784280936454848643, 8.099999999999999645, 0.9763545150501696801 ) ) ;
#22 = AXIS2_PLACEMENT_3D ( 'NONE', #613, #121, #420 ) ;
#23 = CARTESIAN_POINT ( 'NONE',  ( 57.78428093645484864, 8.099999999999999645, -3.393645484949830315 ) ) ;
#24 = ADVANCED_FACE ( 'NONE', ( #134 ), #381, .T. ) ;
#25 = EDGE_CURVE ( 'NONE', #682, #451, #630, .T. ) ;
#26 = EDGE_LOOP ( 'NONE', ( #597, #619, #675, #171 ) ) ;
#27 = DIRECTION ( 'NONE',  ( 0.000000000000000000, 0.000000000000000000, -1.000000000000000000 ) ) ;
#28 = DIRECTION ( 'NONE',  ( 1.000000000000000000, -0.000000000000000000, 0.000000000000000000 ) ) ;
#29 = ORIENTED_EDGE ( 'NONE', *, *, #232, .F. ) ;
#30 = LINE ( 'NONE', #158, #179 ) ;
#31 = CARTESIAN_POINT ( 'NONE',  ( 0.000000000000000000, 8.099999999999999645, -4.593645484949830049 ) ) ;
#32 = ORIENTED_EDGE ( 'NONE', *, *, #522, .F. ) ;
#33 = VECTOR ( 'NONE', #724, 1000.000000000000000 ) ;
#34 = DIRECTION ( 'NONE',  ( 1.000000000000000000, -0.000000000000000000, 0.000000000000000000 ) ) ;
#35 = LINE ( 'NONE', #632, #61 ) ;
#36 = VERTEX_POINT ( 'NONE', #139 ) ;
#37 = DIRECTION ( 'NONE',  ( -1.000000000000000000, 0.000000000000000000, -0.000000000000000000 ) ) ;
#38 = EDGE_CURVE ( 'NONE', #723, #419, #336, .T. ) ;
#39 = VECTOR ( 'NONE', #408, 1000.000000000000000 ) ;
#40 = DIRECTION ( 'NONE',  ( 0.000000000000000000, 0.000000000000000000, -1.000000000000000000 ) ) ;
#41 = ORIENTED_EDGE ( 'NONE', *, *, #668, .F. ) ;
#42 = CARTESIAN_POINT ( 'NONE',  ( 0.000000000000000000, 8.000000000000000000, -4.593645484949830049 ) ) ;
#43 = CARTESIAN_POINT ( 'NONE',  ( 4.784280936454847755, 8.099999999999999645, -3.993645484949829960 ) ) ;
#44 = PLANE ( 'NONE',  #188 ) ;
#45 = LINE ( 'NONE', #42, #39 ) ;
#46 = CARTESIAN_POINT ( 'NONE',  ( 4.784280936454848643, 8.099999999999999645, 0.3763545150501698133 ) ) ;
#47 = AXIS2_PLACEMENT_3D ( 'NONE', #640, #709, #703 ) ;
#48 = ORIENTED_EDGE ( 'NONE', *, *, #475, .T. ) ;
#49 = CARTESIAN_POINT ( 'NONE',  ( 4.784280936454850419, 8.099999999999999645, 10.91635451505016974 ) ) ;
#50 = ORIENTED_EDGE ( 'NONE', *, *, #383, .T. ) ;
#51 = PLANE ( 'NONE',  #404 ) ;
#52 = VECTOR ( 'NONE', #598, 1000.000000000000000 ) ;
#53 = EDGE_LOOP ( 'NONE', ( #515, #186, #138, #454 ) ) ;
#54 = ADVANCED_FACE ( 'NONE', ( #569 ), #72, .F. ) ;
#55 = DIRECTION ( 'NONE',  ( 0.000000000000000000, 0.000000000000000000, 1.000000000000000000 ) ) ;
#56 = EDGE_CURVE ( 'NONE', #346, #285, #554, .T. ) ;
#57 = AXIS2_PLACEMENT_3D ( 'NONE', #679, #570, #199 ) ;
#58 = EDGE_LOOP ( 'NONE', ( #677, #688, #369, #190 ) ) ;
#59 = LINE ( 'NONE', #551, #288 ) ;
#60 = VECTOR ( 'NONE', #12, 1000.000000000000000 ) ;
#61 = VECTOR ( 'NONE', #450, 1000.000000000000000 ) ;
#62 = LINE ( 'NONE', #669, #161 ) ;
#63 = DIRECTION ( 'NONE',  ( 0.000000000000000000, 0.000000000000000000, 1.000000000000000000 ) ) ;
#64 = VERTEX_POINT ( 'NONE', #447 ) ;
#65 = ORIENTED_EDGE ( 'NONE', *, *, #363, .T. ) ;
#66 = LINE ( 'NONE', #303, #442 ) ;
#67 = CARTESIAN_POINT ( 'NONE',  ( -22.71571906354515136, 0.000000000000000000, -16.09364548494983183 ) ) ;
#68 = ORIENTED_EDGE ( 'NONE', *, *, #296, .F. ) ;
#69 = CARTESIAN_POINT ( 'NONE',  ( 57.78428093645484864, 8.099999999999999645, 1.576354515050169436 ) ) ;
#70 = DIRECTION ( 'NONE',  ( 0.000000000000000000, 0.000000000000000000, 1.000000000000000000 ) ) ;
#71 = ORIENTED_EDGE ( 'NONE', *, *, #662, .T. ) ;
#72 = PLANE ( 'NONE',  #653 ) ;
#73 = VECTOR ( 'NONE', #250, 1000.000000000000000 ) ;
#74 = FACE_BOUND ( 'NONE', #406, .T. ) ;
#75 = EDGE_CURVE ( 'NONE', #467, #11, #407, .T. ) ;
#76 = EDGE_CURVE ( 'NONE', #249, #248, #754, .T. ) ;
#77 = PLANE ( 'NONE',  #410 ) ;
#78 = VERTEX_POINT ( 'NONE', #20 ) ;
#79 = DIRECTION ( 'NONE',  ( 0.000000000000000000, 0.000000000000000000, 1.000000000000000000 ) ) ;
#80 = CARTESIAN_POINT ( 'NONE',  ( 0.000000000000000000, 8.000000000000000000, 0.000000000000000000 ) ) ;
#81 = VECTOR ( 'NONE', #372, 1000.000000000000000 ) ;
#82 = CARTESIAN_POINT ( 'NONE',  ( 4.784280936454848643, 8.099999999999999645, 1.576354515050169436 ) ) ;
#83 = VERTEX_POINT ( 'NONE', #311 ) ;
#84 = ORIENTED_EDGE ( 'NONE', *, *, #239, .F. ) ;
#85 =( LENGTH_UNIT ( ) NAMED_UNIT ( * ) SI_UNIT ( .MILLI., .METRE. ) );
#86 = CARTESIAN_POINT ( 'NONE',  ( 2.652792515570686632E-15, 8.099999999999999645, 14.91000000000000014 ) ) ;
#87 = ORIENTED_EDGE ( 'NONE', *, *, #670, .F. ) ;
#88 = PLANE ( 'NONE',  #485 ) ;
#89 = FACE_OUTER_BOUND ( 'NONE', #292, .T. ) ;
#90 = EDGE_LOOP ( 'NONE', ( #335, #87, #422, #747 ) ) ;
#91 = VECTOR ( 'NONE', #411, 1000.000000000000000 ) ;
#92 = ADVANCED_FACE ( 'NONE', ( #748 ), #198, .T. ) ;
#93 = CARTESIAN_POINT ( 'NONE',  ( 57.78428093645484864, 8.000000000000000000, 5.946354515050169098 ) ) ;
#94 = PLANE ( 'NONE',  #563 ) ;
#95 = CARTESIAN_POINT ( 'NONE',  ( 57.78428093645484864, 8.000000000000000000, -3.393645484949829871 ) ) ;
#96 = ORIENTED_EDGE ( 'NONE', *, *, #676, .F. ) ;
#97 = ADVANCED_FACE ( 'NONE', ( #429 ), #673, .T. ) ;
#98 = LINE ( 'NONE', #473, #259 ) ;
#99 = CARTESIAN_POINT ( 'NONE',  ( 57.78428093645484864, 8.099999999999999645, 6.546354515050168743 ) ) ;
#100 = AXIS2_PLACEMENT_3D ( 'NONE', #128, #266, #402 ) ;
#101 = FACE_OUTER_BOUND ( 'NONE', #53, .T. ) ;
#102 = ORIENTED_EDGE ( 'NONE', *, *, #527, .T. ) ;
#103 = AXIS2_PLACEMENT_3D ( 'NONE', #443, #510, #264 ) ;
#104 = CARTESIAN_POINT ( 'NONE',  ( 57.78428093645484864, 8.000000000000000000, 10.91635451505016974 ) ) ;
#105 = DIRECTION ( 'NONE',  ( 0.000000000000000000, 0.000000000000000000, -1.000000000000000000 ) ) ;
#106 = EDGE_CURVE ( 'NONE', #11, #419, #66, .T. ) ;
#107 = ORIENTED_EDGE ( 'NONE', *, *, #164, .T. ) ;
#108 = DIRECTION ( 'NONE',  ( 0.000000000000000000, 0.000000000000000000, -1.000000000000000000 ) ) ;
#109 = VERTEX_POINT ( 'NONE', #738 ) ;
#110 = CARTESIAN_POINT ( 'NONE',  ( 57.78428093645484864, 8.000000000000000000, 6.546354515050169631 ) ) ;
#111 = DIRECTION ( 'NONE',  ( 0.000000000000000000, 1.000000000000000000, 0.000000000000000000 ) ) ;
#112 = ADVANCED_FACE ( 'NONE', ( #187 ), #436, .F. ) ;
#113 = ORIENTED_EDGE ( 'NONE', *, *, #275, .T. ) ;
#114 = LINE ( 'NONE', #784, #256 ) ;
#115 = CLOSED_SHELL ( 'NONE', ( #651, #295, #396, #446, #448, #24, #463, #97, #321, #592, #612, #112, #374, #741, #540, #284, #368, #54, #681, #770, #92, #165, #216, #253, #331, #665 ) ) ;
#116 = EDGE_CURVE ( 'NONE', #725, #78, #45, .T. ) ;
#117 = VERTEX_POINT ( 'NONE', #326 ) ;
#118 = DIRECTION ( 'NONE',  ( 1.000000000000000000, -0.000000000000000000, 0.000000000000000000 ) ) ;
#119 = CIRCLE ( 'NONE', #359, 0.6000000000000003109 ) ;
#120 = DIRECTION ( 'NONE',  ( 1.000000000000000000, -0.000000000000000000, 0.000000000000000000 ) ) ;
#121 = DIRECTION ( 'NONE',  ( 0.000000000000000000, 1.000000000000000000, 0.000000000000000000 ) ) ;
#122 = ORIENTED_EDGE ( 'NONE', *, *, #561, .T. ) ;
#123 = CARTESIAN_POINT ( 'NONE',  ( 4.784280936454849531, 8.099999999999999645, 5.946354515050169098 ) ) ;
#124 = MECHANICAL_DESIGN_GEOMETRIC_PRESENTATION_REPRESENTATION (  '', ( #606 ), #707 ) ;
#125 = CARTESIAN_POINT ( 'NONE',  ( 57.78428093645484864, 8.099999999999999645, 5.346354515050169454 ) ) ;
#126 = EDGE_LOOP ( 'NONE', ( #548, #68, #416, #482 ) ) ;
#127 = ORIENTED_EDGE ( 'NONE', *, *, #560, .T. ) ;
#128 = CARTESIAN_POINT ( 'NONE',  ( -22.71571906354515136, 8.000000000000000000, -16.09364548494983183 ) ) ;
#129 = DIRECTION ( 'NONE',  ( -0.000000000000000000, -1.000000000000000000, -0.000000000000000000 ) ) ;
#130 = PRODUCT_DEFINITION_CONTEXT ( 'detailed design', #461, 'design' ) ;
#131 = VECTOR ( 'NONE', #594, 1000.000000000000000 ) ;
#132 = ORIENTED_EDGE ( 'NONE', *, *, #527, .F. ) ;
#133 = EDGE_CURVE ( 'NONE', #109, #15, #337, .T. ) ;
#134 = FACE_OUTER_BOUND ( 'NONE', #90, .T. ) ;
#135 = FACE_BOUND ( 'NONE', #736, .T. ) ;
#136 = VECTOR ( 'NONE', #700, 1000.000000000000000 ) ;
#137 = CARTESIAN_POINT ( 'NONE',  ( 57.78428093645484864, 8.000000000000000000, 11.51635451505017116 ) ) ;
#138 = ORIENTED_EDGE ( 'NONE', *, *, #183, .F. ) ;
#139 = CARTESIAN_POINT ( 'NONE',  ( 4.784280936454847755, 8.099999999999999645, -3.393645484949830315 ) ) ;
#140 = CYLINDRICAL_SURFACE ( 'NONE', #57, 0.5999999999999998668 ) ;
#141 = DIRECTION ( 'NONE',  ( 0.000000000000000000, 1.000000000000000000, -0.000000000000000000 ) ) ;
#142 = ORIENTED_EDGE ( 'NONE', *, *, #546, .T. ) ;
#143 = VECTOR ( 'NONE', #695, 1000.000000000000000 ) ;
#144 = ORIENTED_EDGE ( 'NONE', *, *, #668, .T. ) ;
#145 = DIRECTION ( 'NONE',  ( -0.000000000000000000, -1.000000000000000000, -0.000000000000000000 ) ) ;
#146 = LINE ( 'NONE', #154, #752 ) ;
#147 = ORIENTED_EDGE ( 'NONE', *, *, #384, .F. ) ;
#148 = LINE ( 'NONE', #332, #611 ) ;
#149 = LINE ( 'NONE', #394, #726 ) ;
#150 = ORIENTED_EDGE ( 'NONE', *, *, #358, .T. ) ;
#151 = EDGE_CURVE ( 'NONE', #36, #355, #222, .T. ) ;
#152 = DIRECTION ( 'NONE',  ( 1.000000000000000000, -0.000000000000000000, 0.000000000000000000 ) ) ;
#153 = DIRECTION ( 'NONE',  ( 0.000000000000000000, 0.000000000000000000, 1.000000000000000000 ) ) ;
#154 = CARTESIAN_POINT ( 'NONE',  ( 4.784280936454849531, 8.099999999999999645, 6.546354515050168743 ) ) ;
#155 = ORIENTED_EDGE ( 'NONE', *, *, #603, .T. ) ;
#156 = VECTOR ( 'NONE', #340, 1000.000000000000000 ) ;
#157 = DIRECTION ( 'NONE',  ( 0.000000000000000000, 0.000000000000000000, 1.000000000000000000 ) ) ;
#158 = CARTESIAN_POINT ( 'NONE',  ( -22.71571906354514425, 0.000000000000000000, 22.90635451505016817 ) ) ;
#159 = FILL_AREA_STYLE_COLOUR ( '', #500 ) ;
#160 = VERTEX_POINT ( 'NONE', #162 ) ;
#161 = VECTOR ( 'NONE', #417, 1000.000000000000000 ) ;
#162 = CARTESIAN_POINT ( 'NONE',  ( 4.784280936454849531, 8.099999999999999645, 5.346354515050169454 ) ) ;
#163 = FILL_AREA_STYLE ('',( #279 ) ) ;
#164 = EDGE_CURVE ( 'NONE', #16, #348, #649, .T. ) ;
#165 = ADVANCED_FACE ( 'NONE', ( #525 ), #88, .T. ) ;
#166 = VECTOR ( 'NONE', #341, 1000.000000000000000 ) ;
#167 = CARTESIAN_POINT ( 'NONE',  ( 57.78428093645484864, 8.099999999999999645, 6.546354515050168743 ) ) ;
#168 = DIRECTION ( 'NONE',  ( 0.000000000000000000, 0.000000000000000000, 1.000000000000000000 ) ) ;
#169 = ORIENTED_EDGE ( 'NONE', *, *, #516, .T. ) ;
#170 = DIRECTION ( 'NONE',  ( -0.000000000000000000, -1.000000000000000000, -0.000000000000000000 ) ) ;
#171 = ORIENTED_EDGE ( 'NONE', *, *, #729, .F. ) ;
#172 = CARTESIAN_POINT ( 'NONE',  ( -22.71571906354514425, 8.000000000000000000, 22.90635451505016817 ) ) ;
#173 = ORIENTED_EDGE ( 'NONE', *, *, #484, .T. ) ;
#174 = DIRECTION ( 'NONE',  ( 0.000000000000000000, 1.000000000000000000, 0.000000000000000000 ) ) ;
#175 = EDGE_CURVE ( 'NONE', #764, #511, #98, .T. ) ;
#176 = CIRCLE ( 'NONE', #622, 0.6000000000000003109 ) ;
#177 = EDGE_LOOP ( 'NONE', ( #458, #652, #717, #202 ) ) ;
#178 = LINE ( 'NONE', #508, #317 ) ;
#179 = VECTOR ( 'NONE', #403, 1000.000000000000000 ) ;
#180 = DIRECTION ( 'NONE',  ( 1.000000000000000000, 0.000000000000000000, 0.000000000000000000 ) ) ;
#181 = VECTOR ( 'NONE', #437, 1000.000000000000000 ) ;
#182 = CARTESIAN_POINT ( 'NONE',  ( 1.768528343713790760E-15, 8.000000000000000000, 5.346354515050169454 ) ) ;
#183 = EDGE_CURVE ( 'NONE', #11, #16, #520, .T. ) ;
#184 = PLANE ( 'NONE',  #693 ) ;
#185 = ORIENTED_EDGE ( 'NONE', *, *, #356, .T. ) ;
#186 = ORIENTED_EDGE ( 'NONE', *, *, #164, .F. ) ;
#187 = FACE_OUTER_BOUND ( 'NONE', #495, .T. ) ;
#188 = AXIS2_PLACEMENT_3D ( 'NONE', #280, #532, #591 ) ;
#189 = DIRECTION ( 'NONE',  ( -0.000000000000000000, -1.000000000000000000, -0.000000000000000000 ) ) ;
#190 = ORIENTED_EDGE ( 'NONE', *, *, #38, .F. ) ;
#191 = EDGE_CURVE ( 'NONE', #586, #414, #587, .T. ) ;
#192 = ORIENTED_EDGE ( 'NONE', *, *, #516, .F. ) ;
#193 = DIRECTION ( 'NONE',  ( -0.000000000000000000, -1.000000000000000000, -0.000000000000000000 ) ) ;
#194 = LINE ( 'NONE', #247, #281 ) ;
#195 = CARTESIAN_POINT ( 'NONE',  ( 57.78428093645484864, 8.099999999999999645, -4.593645484949830049 ) ) ;
#196 = AXIS2_PLACEMENT_3D ( 'NONE', #776, #708, #464 ) ;
#197 = ORIENTED_EDGE ( 'NONE', *, *, #383, .F. ) ;
#198 = CYLINDRICAL_SURFACE ( 'NONE', #509, 0.6000000000000007550 ) ;
#199 = DIRECTION ( 'NONE',  ( 0.000000000000000000, 0.000000000000000000, -1.000000000000000000 ) ) ;
#200 = VECTOR ( 'NONE', #646, 1000.000000000000000 ) ;
#201 = DIRECTION ( 'NONE',  ( 1.000000000000000000, -0.000000000000000000, 0.000000000000000000 ) ) ;
#202 = ORIENTED_EDGE ( 'NONE', *, *, #75, .T. ) ;
#203 = DIRECTION ( 'NONE',  ( -0.000000000000000000, -1.000000000000000000, -0.000000000000000000 ) ) ;
#204 = LINE ( 'NONE', #576, #488 ) ;
#205 = EDGE_LOOP ( 'NONE', ( #282, #362, #785, #462 ) ) ;
#206 = SURFACE_STYLE_USAGE ( .BOTH. , #323 ) ;
#207 = LINE ( 'NONE', #571, #655 ) ;
#208 = ORIENTED_EDGE ( 'NONE', *, *, #151, .T. ) ;
#209 = CYLINDRICAL_SURFACE ( 'NONE', #297, 0.6000000000000001998 ) ;
#210 = DIRECTION ( 'NONE',  ( 0.000000000000000000, 0.000000000000000000, -1.000000000000000000 ) ) ;
#211 = ORIENTED_EDGE ( 'NONE', *, *, #363, .F. ) ;
#212 = FACE_OUTER_BOUND ( 'NONE', #274, .T. ) ;
#213 = AXIS2_PLACEMENT_3D ( 'NONE', #564, #558, #371 ) ;
#214 = VERTEX_POINT ( 'NONE', #771 ) ;
#215 =( GEOMETRIC_REPRESENTATION_CONTEXT ( 3 ) GLOBAL_UNCERTAINTY_ASSIGNED_CONTEXT ( ( #287 ) ) GLOBAL_UNIT_ASSIGNED_CONTEXT ( ( #766, #758, #389 ) ) REPRESENTATION_CONTEXT ( 'NONE', 'WORKASPACE' ) );
#216 = ADVANCED_FACE ( 'NONE', ( #698 ), #716, .F. ) ;
#217 = EDGE_CURVE ( 'NONE', #730, #586, #455, .T. ) ;
#218 = DIRECTION ( 'NONE',  ( 0.000000000000000000, 1.000000000000000000, 0.000000000000000000 ) ) ;
#219 = DIRECTION ( 'NONE',  ( 0.000000000000000000, 0.000000000000000000, 1.000000000000000000 ) ) ;
#220 = CARTESIAN_POINT ( 'NONE',  ( 57.78428093645484864, 8.099999999999999645, -3.993645484949829960 ) ) ;
#221 = VECTOR ( 'NONE', #118, 1000.000000000000000 ) ;
#222 = LINE ( 'NONE', #765, #547 ) ;
#223 = VERTEX_POINT ( 'NONE', #469 ) ;
#224 = SURFACE_SIDE_STYLE ('',( #480 ) ) ;
#225 = PRODUCT_DEFINITION ( 'UNKNOWN', '', #227, #130 ) ;
#226 = EDGE_LOOP ( 'NONE', ( #306, #351, #697, #107 ) ) ;
#227 = PRODUCT_DEFINITION_FORMATION_WITH_SPECIFIED_SOURCE ( 'ANY', '', #476, .NOT_KNOWN. ) ;
#228 = CARTESIAN_POINT ( 'NONE',  ( 0.000000000000000000, 8.099999999999999645, -4.593645484949830049 ) ) ;
#229 = AXIS2_PLACEMENT_3D ( 'NONE', #672, #174, #549 ) ;
#230 = ORIENTED_EDGE ( 'NONE', *, *, #504, .T. ) ;
#231 = FACE_OUTER_BOUND ( 'NONE', #635, .T. ) ;
#232 = EDGE_CURVE ( 'NONE', #511, #562, #609, .T. ) ;
#233 = ORIENTED_EDGE ( 'NONE', *, *, #475, .F. ) ;
#234 = LINE ( 'NONE', #426, #221 ) ;
#235 = AXIS2_PLACEMENT_3D ( 'NONE', #93, #218, #761 ) ;
#236 = AXIS2_PLACEMENT_3D ( 'NONE', #588, #714, #157 ) ;
#237 = EDGE_LOOP ( 'NONE', ( #663, #753, #705, #155 ) ) ;
#238 = CARTESIAN_POINT ( 'NONE',  ( 1.768528343713790760E-15, 8.099999999999999645, 9.939999999999999503 ) ) ;
#239 = EDGE_CURVE ( 'NONE', #83, #117, #148, .T. ) ;
#240 = EDGE_CURVE ( 'NONE', #348, #601, #272, .T. ) ;
#241 = CIRCLE ( 'NONE', #47, 0.5999999999999998668 ) ;
#242 = DIRECTION ( 'NONE',  ( 0.000000000000000000, 1.000000000000000000, 0.000000000000000000 ) ) ;
#243 = CARTESIAN_POINT ( 'NONE',  ( -22.71571906354515136, 8.000000000000000000, -16.09364548494983183 ) ) ;
#244 = ORIENTED_EDGE ( 'NONE', *, *, #1, .F. ) ;
#245 = ORIENTED_EDGE ( 'NONE', *, *, #728, .T. ) ;
#246 = DIRECTION ( 'NONE',  ( 0.000000000000000000, 0.000000000000000000, 1.000000000000000000 ) ) ;
#247 = CARTESIAN_POINT ( 'NONE',  ( 57.78428093645484864, 8.099999999999999645, 0.3763545150501698133 ) ) ;
#248 = VERTEX_POINT ( 'NONE', #702 ) ;
#249 = VERTEX_POINT ( 'NONE', #579 ) ;
#250 = DIRECTION ( 'NONE',  ( -0.000000000000000000, -0.000000000000000000, -1.000000000000000000 ) ) ;
#251 = CIRCLE ( 'NONE', #643, 0.6000000000000003109 ) ;
#252 = LINE ( 'NONE', #304, #181 ) ;
#253 = ADVANCED_FACE ( 'NONE', ( #212 ), #209, .T. ) ;
#254 = EDGE_LOOP ( 'NONE', ( #71, #604, #760, #208 ) ) ;
#255 = DIRECTION ( 'NONE',  ( -1.000000000000000000, -0.000000000000000000, -0.000000000000000000 ) ) ;
#256 = VECTOR ( 'NONE', #545, 1000.000000000000000 ) ;
#257 = DIRECTION ( 'NONE',  ( 0.000000000000000000, 1.000000000000000000, 0.000000000000000000 ) ) ;
#258 = PLANE ( 'NONE',  #103 ) ;
#259 = VECTOR ( 'NONE', #34, 1000.000000000000000 ) ;
#260 = ORIENTED_EDGE ( 'NONE', *, *, #456, .F. ) ;
#261 = CARTESIAN_POINT ( 'NONE',  ( 4.784280936454850419, 8.000000000000000000, 10.91635451505016974 ) ) ;
#262 = PLANE ( 'NONE',  #512 ) ;
#263 = VERTEX_POINT ( 'NONE', #641 ) ;
#264 = DIRECTION ( 'NONE',  ( 0.000000000000000000, -0.000000000000000000, 1.000000000000000000 ) ) ;
#265 = EDGE_LOOP ( 'NONE', ( #245, #737, #391, #102 ) ) ;
#266 = DIRECTION ( 'NONE',  ( 1.000000000000000000, 0.000000000000000000, -1.779203565104417621E-16 ) ) ;
#267 = CARTESIAN_POINT ( 'NONE',  ( 4.784280936454848643, 8.099999999999999645, 1.576354515050169436 ) ) ;
#268 = CARTESIAN_POINT ( 'NONE',  ( 1.768528343713790760E-15, 8.099999999999999645, 6.546354515050168743 ) ) ;
#269 = EDGE_LOOP ( 'NONE', ( #320, #573, #289, #113 ) ) ;
#270 = DIRECTION ( 'NONE',  ( 0.000000000000000000, 0.000000000000000000, -1.000000000000000000 ) ) ;
#271 = CARTESIAN_POINT ( 'NONE',  ( 76.28428093645484864, 8.000000000000000000, -16.09364548494983183 ) ) ;
#272 = CIRCLE ( 'NONE', #376, 0.5999999999999998668 ) ;
#273 = FACE_OUTER_BOUND ( 'NONE', #177, .T. ) ;
#274 = EDGE_LOOP ( 'NONE', ( #96, #395, #173, #387 ) ) ;
#275 = EDGE_CURVE ( 'NONE', #764, #109, #334, .T. ) ;
#276 = DIRECTION ( 'NONE',  ( 0.000000000000000000, 0.000000000000000000, -1.000000000000000000 ) ) ;
#277 = AXIS2_PLACEMENT_3D ( 'NONE', #43, #777, #521 ) ;
#278 = DIRECTION ( 'NONE',  ( -0.000000000000000000, -1.000000000000000000, -0.000000000000000000 ) ) ;
#279 = FILL_AREA_STYLE_COLOUR ( '', #732 ) ;
#280 = CARTESIAN_POINT ( 'NONE',  ( 2.652792515570686632E-15, 8.099999999999999645, 11.51635451505017116 ) ) ;
#281 = VECTOR ( 'NONE', #129, 1000.000000000000000 ) ;
#282 = ORIENTED_EDGE ( 'NONE', *, *, #456, .T. ) ;
#283 = DIRECTION ( 'NONE',  ( 0.000000000000000000, 0.000000000000000000, 1.000000000000000000 ) ) ;
#284 = ADVANCED_FACE ( 'NONE', ( #759 ), #258, .F. ) ;
#285 = VERTEX_POINT ( 'NONE', #95 ) ;
#286 = DIRECTION ( 'NONE',  ( 1.000000000000000000, 0.000000000000000000, -0.000000000000000000 ) ) ;
#287 = UNCERTAINTY_MEASURE_WITH_UNIT (LENGTH_MEASURE( 1.000000000000000082E-05 ), #766, 'distance_accuracy_value', 'NONE');
#288 = VECTOR ( 'NONE', #180, 1000.000000000000000 ) ;
#289 = ORIENTED_EDGE ( 'NONE', *, *, #175, .F. ) ;
#290 = DIRECTION ( 'NONE',  ( 1.000000000000000000, -0.000000000000000000, 0.000000000000000000 ) ) ;
#291 = AXIS2_PLACEMENT_3D ( 'NONE', #428, #360, #357 ) ;
#292 = EDGE_LOOP ( 'NONE', ( #577, #3, #557, #666 ) ) ;
#293 = PLANE ( 'NONE',  #671 ) ;
#294 = VECTOR ( 'NONE', #152, 1000.000000000000000 ) ;
#295 = ADVANCED_FACE ( 'NONE', ( #273 ), #751, .T. ) ;
#296 = EDGE_CURVE ( 'NONE', #467, #723, #207, .T. ) ;
#297 = AXIS2_PLACEMENT_3D ( 'NONE', #397, #583, #270 ) ;
#298 = DIRECTION ( 'NONE',  ( 0.000000000000000000, 0.000000000000000000, -1.000000000000000000 ) ) ;
#299 = FACE_OUTER_BOUND ( 'NONE', #302, .T. ) ;
#300 = ORIENTED_EDGE ( 'NONE', *, *, #106, .F. ) ;
#301 = EDGE_CURVE ( 'NONE', #160, #263, #566, .T. ) ;
#302 = EDGE_LOOP ( 'NONE', ( #633, #233, #244, #638 ) ) ;
#303 = CARTESIAN_POINT ( 'NONE',  ( 4.784280936454850419, 8.099999999999999645, 11.51635451505017116 ) ) ;
#304 = CARTESIAN_POINT ( 'NONE',  ( 0.000000000000000000, 8.000000000000000000, -3.393645484949830315 ) ) ;
#305 = VERTEX_POINT ( 'NONE', #691 ) ;
#306 = ORIENTED_EDGE ( 'NONE', *, *, #240, .T. ) ;
#307 = CARTESIAN_POINT ( 'NONE',  ( 4.784280936454850419, 8.099999999999999645, 11.51635451505017116 ) ) ;
#308 = EDGE_CURVE ( 'NONE', #223, #375, #146, .T. ) ;
#309 = LINE ( 'NONE', #67, #596 ) ;
#310 = EDGE_LOOP ( 'NONE', ( #150, #740, #768, #489 ) ) ;
#311 = CARTESIAN_POINT ( 'NONE',  ( 4.784280936454848643, 8.000000000000000000, 0.3763545150501698133 ) ) ;
#312 = CARTESIAN_POINT ( 'NONE',  ( 4.784280936454849531, 8.000000000000000000, 5.946354515050169098 ) ) ;
#313 = PRESENTATION_LAYER_ASSIGNMENT (  '', '', ( #773 ) ) ;
#314 = FACE_OUTER_BOUND ( 'NONE', #205, .T. ) ;
#315 = ORIENTED_EDGE ( 'NONE', *, *, #625, .F. ) ;
#316 = DIRECTION ( 'NONE',  ( 0.000000000000000000, 1.000000000000000000, 0.000000000000000000 ) ) ;
#317 = VECTOR ( 'NONE', #626, 1000.000000000000000 ) ;
#318 = PLANE ( 'NONE',  #775 ) ;
#319 = FACE_OUTER_BOUND ( 'NONE', #237, .T. ) ;
#320 = ORIENTED_EDGE ( 'NONE', *, *, #133, .T. ) ;
#321 = ADVANCED_FACE ( 'NONE', ( #314 ), #77, .F. ) ;
#322 = EDGE_LOOP ( 'NONE', ( #84, #541, #142, #431 ) ) ;
#323 = SURFACE_SIDE_STYLE ('',( #409 ) ) ;
#324 = DIRECTION ( 'NONE',  ( -0.000000000000000000, -1.000000000000000000, -0.000000000000000000 ) ) ;
#325 = VERTEX_POINT ( 'NONE', #195 ) ;
#326 = CARTESIAN_POINT ( 'NONE',  ( 57.78428093645484864, 8.000000000000000000, 0.3763545150501698133 ) ) ;
#327 =( NAMED_UNIT ( * ) SI_UNIT ( $, .STERADIAN. ) SOLID_ANGLE_UNIT ( ) );
#328 = AXIS2_PLACEMENT_3D ( 'NONE', #238, #552, #8 ) ;
#329 = CARTESIAN_POINT ( 'NONE',  ( 4.784280936454847755, 8.000000000000000000, -3.393645484949830315 ) ) ;
#330 = EDGE_LOOP ( 'NONE', ( #529, #568, #615, #367 ) ) ;
#331 = ADVANCED_FACE ( 'NONE', ( #89 ), #580, .T. ) ;
#332 = CARTESIAN_POINT ( 'NONE',  ( 8.842641718568953798E-16, 8.000000000000000000, 0.3763545150501698133 ) ) ;
#333 = CARTESIAN_POINT ( 'NONE',  ( 57.78428093645484864, 8.099999999999999645, 5.946354515050169098 ) ) ;
#334 = LINE ( 'NONE', #82, #200 ) ;
#335 = ORIENTED_EDGE ( 'NONE', *, *, #191, .T. ) ;
#336 = CIRCLE ( 'NONE', #373, 0.5999999999999998668 ) ;
#337 = LINE ( 'NONE', #644, #294 ) ;
#338 = CARTESIAN_POINT ( 'NONE',  ( 57.78428093645484864, 8.099999999999999645, 10.31635451505017009 ) ) ;
#339 = AXIS2_PLACEMENT_3D ( 'NONE', #49, #661, #108 ) ;
#340 = DIRECTION ( 'NONE',  ( 1.000000000000000000, -0.000000000000000000, 0.000000000000000000 ) ) ;
#341 = DIRECTION ( 'NONE',  ( -0.000000000000000000, -1.000000000000000000, -0.000000000000000000 ) ) ;
#342 = PRESENTATION_STYLE_ASSIGNMENT (( #206 ) ) ;
#343 = CARTESIAN_POINT ( 'NONE',  ( 1.768528343713790760E-15, 8.000000000000000000, 6.546354515050168743 ) ) ;
#344 = VECTOR ( 'NONE', #517, 1000.000000000000000 ) ;
#345 = APPLICATION_PROTOCOL_DEFINITION ( 'draft international standard', 'automotive_design', 1998, #461 ) ;
#346 = VERTEX_POINT ( 'NONE', #23 ) ;
#347 =( NAMED_UNIT ( * ) SI_UNIT ( $, .STERADIAN. ) SOLID_ANGLE_UNIT ( ) );
#348 = VERTEX_POINT ( 'NONE', #137 ) ;
#349 = CARTESIAN_POINT ( 'NONE',  ( 4.784280936454849531, 8.099999999999999645, 5.946354515050169098 ) ) ;
#350 = LINE ( 'NONE', #657, #91 ) ;
#351 = ORIENTED_EDGE ( 'NONE', *, *, #7, .F. ) ;
#352 = DIRECTION ( 'NONE',  ( 0.000000000000000000, 0.000000000000000000, 1.000000000000000000 ) ) ;
#353 = CIRCLE ( 'NONE', #719, 0.5999999999999998668 ) ;
#354 = CIRCLE ( 'NONE', #492, 0.6000000000000007550 ) ;
#355 = VERTEX_POINT ( 'NONE', #329 ) ;
#356 = EDGE_CURVE ( 'NONE', #607, #725, #204, .T. ) ;
#357 = DIRECTION ( 'NONE',  ( 0.000000000000000000, 0.000000000000000000, 1.000000000000000000 ) ) ;
#358 = EDGE_CURVE ( 'NONE', #223, #730, #627, .T. ) ;
#359 = AXIS2_PLACEMENT_3D ( 'NONE', #21, #631, #690 ) ;
#360 = DIRECTION ( 'NONE',  ( 0.000000000000000000, 1.000000000000000000, 0.000000000000000000 ) ) ;
#361 = CARTESIAN_POINT ( 'NONE',  ( 4.784280936454848643, 8.000000000000000000, 0.9763545150501696801 ) ) ;
#362 = ORIENTED_EDGE ( 'NONE', *, *, #217, .F. ) ;
#363 = EDGE_CURVE ( 'NONE', #160, #618, #35, .T. ) ;
#364 = CIRCLE ( 'NONE', #433, 0.6000000000000003109 ) ;
#365 = DIRECTION ( 'NONE',  ( -0.000000000000000000, -1.000000000000000000, -0.000000000000000000 ) ) ;
#366 = DIRECTION ( 'NONE',  ( 0.000000000000000000, -0.000000000000000000, 1.000000000000000000 ) ) ;
#367 = ORIENTED_EDGE ( 'NONE', *, *, #56, .T. ) ;
#368 = ADVANCED_FACE ( 'NONE', ( #319 ), #262, .T. ) ;
#369 = ORIENTED_EDGE ( 'NONE', *, *, #533, .F. ) ;
#370 = APPLICATION_CONTEXT ( 'automotive_design' ) ;
#371 = DIRECTION ( 'NONE',  ( 0.000000000000000000, 0.000000000000000000, -1.000000000000000000 ) ) ;
#372 = DIRECTION ( 'NONE',  ( 1.779203565104417621E-16, 0.000000000000000000, 1.000000000000000000 ) ) ;
#373 = AXIS2_PLACEMENT_3D ( 'NONE', #261, #316, #79 ) ;
#374 = ADVANCED_FACE ( 'NONE', ( #637 ), #460, .F. ) ;
#375 = VERTEX_POINT ( 'NONE', #696 ) ;
#376 = AXIS2_PLACEMENT_3D ( 'NONE', #104, #639, #412 ) ;
#377 = CARTESIAN_POINT ( 'NONE',  ( 0.000000000000000000, 8.099999999999999645, -3.393645484949830315 ) ) ;
#378 = DIRECTION ( 'NONE',  ( -0.000000000000000000, -1.000000000000000000, -0.000000000000000000 ) ) ;
#379 = DIRECTION ( 'NONE',  ( -0.000000000000000000, -1.000000000000000000, -0.000000000000000000 ) ) ;
#380 = ORIENTED_EDGE ( 'NONE', *, *, #658, .F. ) ;
#381 = CYLINDRICAL_SURFACE ( 'NONE', #213, 0.6000000000000007550 ) ;
#382 = LINE ( 'NONE', #565, #81 ) ;
#383 = EDGE_CURVE ( 'NONE', #757, #214, #518, .T. ) ;
#384 = EDGE_CURVE ( 'NONE', #214, #451, #149, .T. ) ;
#385 = CARTESIAN_POINT ( 'NONE',  ( 8.842641718568953798E-16, 8.099999999999999645, 4.969999999999999751 ) ) ;
#386 = ORIENTED_EDGE ( 'NONE', *, *, #670, .T. ) ;
#387 = ORIENTED_EDGE ( 'NONE', *, *, #275, .F. ) ;
#388 = LINE ( 'NONE', #69, #530 ) ;
#389 =( NAMED_UNIT ( * ) SI_UNIT ( $, .STERADIAN. ) SOLID_ANGLE_UNIT ( ) );
#390 = CARTESIAN_POINT ( 'NONE',  ( 1.768528343713790760E-15, 8.099999999999999645, 5.346354515050169454 ) ) ;
#391 = ORIENTED_EDGE ( 'NONE', *, *, #421, .F. ) ;
#392 = CARTESIAN_POINT ( 'NONE',  ( 8.842641718568953798E-16, 8.099999999999999645, 0.3763545150501698133 ) ) ;
#393 =( NAMED_UNIT ( * ) PLANE_ANGLE_UNIT ( ) SI_UNIT ( $, .RADIAN. ) );
#394 = CARTESIAN_POINT ( 'NONE',  ( 76.28428093645484864, 8.000000000000000000, -16.09364548494983183 ) ) ;
#395 = ORIENTED_EDGE ( 'NONE', *, *, #755, .T. ) ;
#396 = ADVANCED_FACE ( 'NONE', ( #781 ), #472, .T. ) ;
#397 = CARTESIAN_POINT ( 'NONE',  ( 4.784280936454848643, 8.099999999999999645, 0.9763545150501696801 ) ) ;
#398 = AXIS2_PLACEMENT_3D ( 'NONE', #718, #105, #528 ) ;
#399 = DIRECTION ( 'NONE',  ( 0.000000000000000000, 1.000000000000000000, -0.000000000000000000 ) ) ;
#400 = EDGE_LOOP ( 'NONE', ( #680, #192, #720, #783 ) ) ;
#401 = EDGE_CURVE ( 'NONE', #346, #325, #176, .T. ) ;
#402 = DIRECTION ( 'NONE',  ( -1.779203565104417621E-16, 0.000000000000000000, -1.000000000000000000 ) ) ;
#403 = DIRECTION ( 'NONE',  ( 1.000000000000000000, 0.000000000000000000, 0.000000000000000000 ) ) ;
#404 = AXIS2_PLACEMENT_3D ( 'NONE', #667, #298, #542 ) ;
#405 = SURFACE_STYLE_USAGE ( .BOTH. , #224 ) ;
#406 = EDGE_LOOP ( 'NONE', ( #614, #780, #623, #519 ) ) ;
#407 = CIRCLE ( 'NONE', #715, 0.5999999999999998668 ) ;
#408 = DIRECTION ( 'NONE',  ( 1.000000000000000000, -0.000000000000000000, 0.000000000000000000 ) ) ;
#409 = SURFACE_STYLE_FILL_AREA ( #163 ) ;
#410 = AXIS2_PLACEMENT_3D ( 'NONE', #268, #40, #763 ) ;
#411 = DIRECTION ( 'NONE',  ( -0.000000000000000000, -1.000000000000000000, -0.000000000000000000 ) ) ;
#412 = DIRECTION ( 'NONE',  ( 0.000000000000000000, 0.000000000000000000, 1.000000000000000000 ) ) ;
#413 = PRODUCT_CONTEXT ( 'NONE', #370, 'mechanical' ) ;
#414 = VERTEX_POINT ( 'NONE', #537 ) ;
#415 = CARTESIAN_POINT ( 'NONE',  ( 4.784280936454850419, 8.000000000000000000, 11.51635451505017116 ) ) ;
#416 = ORIENTED_EDGE ( 'NONE', *, *, #593, .T. ) ;
#417 = DIRECTION ( 'NONE',  ( 1.000000000000000000, -0.000000000000000000, 0.000000000000000000 ) ) ;
#418 = PLANE ( 'NONE',  #398 ) ;
#419 = VERTEX_POINT ( 'NONE', #415 ) ;
#420 = DIRECTION ( 'NONE',  ( 0.000000000000000000, 0.000000000000000000, 1.000000000000000000 ) ) ;
#421 = EDGE_CURVE ( 'NONE', #607, #325, #539, .T. ) ;
#422 = ORIENTED_EDGE ( 'NONE', *, *, #710, .F. ) ;
#423 = VECTOR ( 'NONE', #145, 1000.000000000000000 ) ;
#424 = CARTESIAN_POINT ( 'NONE',  ( 57.78428093645484864, 8.099999999999999645, 1.576354515050169436 ) ) ;
#425 = MECHANICAL_DESIGN_GEOMETRIC_PRESENTATION_REPRESENTATION (  '', ( #773 ), #629 ) ;
#426 = CARTESIAN_POINT ( 'NONE',  ( 2.652792515570686632E-15, 8.000000000000000000, 11.51635451505017116 ) ) ;
#427 = CIRCLE ( 'NONE', #291, 0.6000000000000003109 ) ;
#428 = CARTESIAN_POINT ( 'NONE',  ( 4.784280936454847755, 8.000000000000000000, -3.993645484949829960 ) ) ;
#429 = FACE_OUTER_BOUND ( 'NONE', #659, .T. ) ;
#430 = LINE ( 'NONE', #125, #471 ) ;
#431 = ORIENTED_EDGE ( 'NONE', *, *, #658, .T. ) ;
#432 = EDGE_CURVE ( 'NONE', #479, #248, #350, .T. ) ;
#433 = AXIS2_PLACEMENT_3D ( 'NONE', #664, #608, #352 ) ;
#434 = EDGE_LOOP ( 'NONE', ( #692, #147, #197, #169 ) ) ;
#435 = MANIFOLD_SOLID_BREP ( 'LPattern1', #115 ) ;
#436 = PLANE ( 'NONE',  #100 ) ;
#437 = DIRECTION ( 'NONE',  ( 1.000000000000000000, -0.000000000000000000, 0.000000000000000000 ) ) ;
#438 = ORIENTED_EDGE ( 'NONE', *, *, #13, .T. ) ;
#439 = CARTESIAN_POINT ( 'NONE',  ( -22.71571906354515136, 8.000000000000000000, -16.09364548494983183 ) ) ;
#440 = DIRECTION ( 'NONE',  ( 0.000000000000000000, 1.000000000000000000, 0.000000000000000000 ) ) ;
#441 = FACE_OUTER_BOUND ( 'NONE', #265, .T. ) ;
#442 = VECTOR ( 'NONE', #497, 1000.000000000000000 ) ;
#443 = CARTESIAN_POINT ( 'NONE',  ( 0.000000000000000000, 0.000000000000000000, 0.000000000000000000 ) ) ;
#444 = ORIENTED_EDGE ( 'NONE', *, *, #296, .T. ) ;
#445 = AXIS2_PLACEMENT_3D ( 'NONE', #756, #704, #453 ) ;
#446 = ADVANCED_FACE ( 'NONE', ( #101 ), #44, .F. ) ;
#447 = CARTESIAN_POINT ( 'NONE',  ( 4.784280936454848643, 8.099999999999999645, 0.3763545150501698133 ) ) ;
#448 = ADVANCED_FACE ( 'NONE', ( #774 ), #418, .T. ) ;
#449 = DIRECTION ( 'NONE',  ( 0.000000000000000000, 1.000000000000000000, 0.000000000000000000 ) ) ;
#450 = DIRECTION ( 'NONE',  ( -0.000000000000000000, -1.000000000000000000, -0.000000000000000000 ) ) ;
#451 = VERTEX_POINT ( 'NONE', #466 ) ;
#452 = LINE ( 'NONE', #17, #423 ) ;
#453 = DIRECTION ( 'NONE',  ( -1.000000000000000000, 0.000000000000000000, -0.000000000000000000 ) ) ;
#454 = ORIENTED_EDGE ( 'NONE', *, *, #106, .T. ) ;
#455 = LINE ( 'NONE', #167, #749 ) ;
#456 = EDGE_CURVE ( 'NONE', #375, #586, #711, .T. ) ;
#457 = CARTESIAN_POINT ( 'NONE',  ( 76.28428093645484864, 8.000000000000000000, -16.09364548494983183 ) ) ;
#458 = ORIENTED_EDGE ( 'NONE', *, *, #183, .T. ) ;
#459 = DIRECTION ( 'NONE',  ( -0.000000000000000000, -1.000000000000000000, -0.000000000000000000 ) ) ;
#460 = PLANE ( 'NONE',  #445 ) ;
#461 = APPLICATION_CONTEXT ( 'automotive_design' ) ;
#462 = ORIENTED_EDGE ( 'NONE', *, *, #308, .T. ) ;
#463 = ADVANCED_FACE ( 'NONE', ( #493 ), #602, .T. ) ;
#464 = DIRECTION ( 'NONE',  ( -1.000000000000000000, 0.000000000000000000, -0.000000000000000000 ) ) ;
#465 = DIRECTION ( 'NONE',  ( 0.000000000000000000, 1.000000000000000000, 0.000000000000000000 ) ) ;
#466 = CARTESIAN_POINT ( 'NONE',  ( 76.28428093645484864, 0.000000000000000000, -16.09364548494983183 ) ) ;
#467 = VERTEX_POINT ( 'NONE', #733 ) ;
#468 = EDGE_CURVE ( 'NONE', #15, #117, #364, .T. ) ;
#469 = CARTESIAN_POINT ( 'NONE',  ( 4.784280936454849531, 8.099999999999999645, 6.546354515050168743 ) ) ;
#470 = APPLICATION_PROTOCOL_DEFINITION ( 'draft international standard', 'automotive_design', 1998, #370 ) ;
#471 = VECTOR ( 'NONE', #378, 1000.000000000000000 ) ;
#472 = CYLINDRICAL_SURFACE ( 'NONE', #339, 0.5999999999999998668 ) ;
#473 = CARTESIAN_POINT ( 'NONE',  ( 8.842641718568953798E-16, 8.099999999999999645, 1.576354515050169436 ) ) ;
#474 = ORIENTED_EDGE ( 'NONE', *, *, #191, .F. ) ;
#475 = EDGE_CURVE ( 'NONE', #305, #249, #605, .T. ) ;
#476 = PRODUCT ( '2018-08-03 device mold channels 100�m', '2018-08-03 device mold channels 100�m', '', ( #413 ) ) ;
#477 =( NAMED_UNIT ( * ) PLANE_ANGLE_UNIT ( ) SI_UNIT ( $, .RADIAN. ) );
#478 = DIRECTION ( 'NONE',  ( 1.000000000000000000, 0.000000000000000000, 0.000000000000000000 ) ) ;
#479 = VERTEX_POINT ( 'NONE', #172 ) ;
#480 = SURFACE_STYLE_FILL_AREA ( #779 ) ;
#481 = CIRCLE ( 'NONE', #229, 0.6000000000000003109 ) ;
#482 = ORIENTED_EDGE ( 'NONE', *, *, #7, .T. ) ;
#483 = LINE ( 'NONE', #731, #33 ) ;
#484 = EDGE_CURVE ( 'NONE', #83, #109, #251, .T. ) ;
#485 = AXIS2_PLACEMENT_3D ( 'NONE', #392, #276, #37 ) ;
#486 = ORIENTED_EDGE ( 'NONE', *, *, #75, .F. ) ;
#487 = CARTESIAN_POINT ( 'NONE',  ( 2.652792515570686632E-15, 8.000000000000000000, 10.31635451505017009 ) ) ;
#488 = VECTOR ( 'NONE', #379, 1000.000000000000000 ) ;
#489 = ORIENTED_EDGE ( 'NONE', *, *, #522, .T. ) ;
#490 = DIRECTION ( 'NONE',  ( 0.000000000000000000, 1.000000000000000000, 0.000000000000000000 ) ) ;
#491 = UNCERTAINTY_MEASURE_WITH_UNIT (LENGTH_MEASURE( 1.000000000000000082E-05 ), #85, 'distance_accuracy_value', 'NONE');
#492 = AXIS2_PLACEMENT_3D ( 'NONE', #333, #465, #153 ) ;
#493 = FACE_OUTER_BOUND ( 'NONE', #310, .T. ) ;
#494 = CARTESIAN_POINT ( 'NONE',  ( -22.71571906354515136, 8.000000000000000000, -16.09364548494983183 ) ) ;
#495 = EDGE_LOOP ( 'NONE', ( #712, #647, #315, #48 ) ) ;
#496 = ORIENTED_EDGE ( 'NONE', *, *, #301, .T. ) ;
#497 = DIRECTION ( 'NONE',  ( -0.000000000000000000, -1.000000000000000000, -0.000000000000000000 ) ) ;
#498 = FACE_OUTER_BOUND ( 'NONE', #556, .T. ) ;
#499 = ORIENTED_EDGE ( 'NONE', *, *, #534, .F. ) ;
#500 = COLOUR_RGB ( '',1.000000000000000000, 1.000000000000000000, 1.000000000000000000 ) ;
#501 = LINE ( 'NONE', #439, #769 ) ;
#502 = DIRECTION ( 'NONE',  ( -1.000000000000000000, 0.000000000000000000, -0.000000000000000000 ) ) ;
#503 = FACE_OUTER_BOUND ( 'NONE', #524, .T. ) ;
#504 = EDGE_CURVE ( 'NONE', #479, #757, #59, .T. ) ;
#505 = CIRCLE ( 'NONE', #22, 0.6000000000000003109 ) ;
#506 = ORIENTED_EDGE ( 'NONE', *, *, #38, .T. ) ;
#507 = CARTESIAN_POINT ( 'NONE',  ( 76.28428093645484864, 0.000000000000000000, -16.09364548494983183 ) ) ;
#508 = CARTESIAN_POINT ( 'NONE',  ( 57.78428093645484864, 8.099999999999999645, -4.593645484949830049 ) ) ;
#509 = AXIS2_PLACEMENT_3D ( 'NONE', #689, #203, #694 ) ;
#510 = DIRECTION ( 'NONE',  ( 0.000000000000000000, 1.000000000000000000, 0.000000000000000000 ) ) ;
#511 = VERTEX_POINT ( 'NONE', #424 ) ;
#512 = AXIS2_PLACEMENT_3D ( 'NONE', #31, #210, #514 ) ;
#513 = CARTESIAN_POINT ( 'NONE',  ( 4.784280936454850419, 8.099999999999999645, 10.91635451505016974 ) ) ;
#514 = DIRECTION ( 'NONE',  ( -1.000000000000000000, 0.000000000000000000, -0.000000000000000000 ) ) ;
#515 = ORIENTED_EDGE ( 'NONE', *, *, #533, .T. ) ;
#516 = EDGE_CURVE ( 'NONE', #757, #682, #483, .T. ) ;
#517 = DIRECTION ( 'NONE',  ( -0.000000000000000000, -1.000000000000000000, -0.000000000000000000 ) ) ;
#518 = LINE ( 'NONE', #457, #136 ) ;
#519 = ORIENTED_EDGE ( 'NONE', *, *, #133, .F. ) ;
#520 = LINE ( 'NONE', #535, #131 ) ;
#521 = DIRECTION ( 'NONE',  ( 0.000000000000000000, 0.000000000000000000, -1.000000000000000000 ) ) ;
#522 = EDGE_CURVE ( 'NONE', #160, #223, #353, .T. ) ;
#523 = CARTESIAN_POINT ( 'NONE',  ( 1.768528343713790760E-15, 8.099999999999999645, 6.546354515050168743 ) ) ;
#524 = EDGE_LOOP ( 'NONE', ( #544, #380, #29, #438 ) ) ;
#525 = FACE_OUTER_BOUND ( 'NONE', #322, .T. ) ;
#526 = LINE ( 'NONE', #46, #344 ) ;
#527 = EDGE_CURVE ( 'NONE', #607, #36, #481, .T. ) ;
#528 = DIRECTION ( 'NONE',  ( -1.000000000000000000, 0.000000000000000000, -0.000000000000000000 ) ) ;
#529 = ORIENTED_EDGE ( 'NONE', *, *, #534, .T. ) ;
#530 = VECTOR ( 'NONE', #743, 1000.000000000000000 ) ;
#531 = CARTESIAN_POINT ( 'NONE',  ( 57.78428093645484864, 8.099999999999999645, 11.51635451505017116 ) ) ;
#532 = DIRECTION ( 'NONE',  ( 0.000000000000000000, 0.000000000000000000, -1.000000000000000000 ) ) ;
#533 = EDGE_CURVE ( 'NONE', #419, #348, #234, .T. ) ;
#534 = EDGE_CURVE ( 'NONE', #285, #78, #505, .T. ) ;
#535 = CARTESIAN_POINT ( 'NONE',  ( 2.652792515570686632E-15, 8.099999999999999645, 11.51635451505017116 ) ) ;
#536 = DIRECTION ( 'NONE',  ( -1.000000000000000000, -0.000000000000000000, -0.000000000000000000 ) ) ;
#537 = CARTESIAN_POINT ( 'NONE',  ( 57.78428093645484864, 8.000000000000000000, 5.346354515050169454 ) ) ;
#538 = ORIENTED_EDGE ( 'NONE', *, *, #1, .T. ) ;
#539 = LINE ( 'NONE', #228, #156 ) ;
#540 = ADVANCED_FACE ( 'NONE', ( #299 ), #293, .F. ) ;
#541 = ORIENTED_EDGE ( 'NONE', *, *, #755, .F. ) ;
#542 = DIRECTION ( 'NONE',  ( -1.000000000000000000, 0.000000000000000000, -0.000000000000000000 ) ) ;
#543 = SHAPE_DEFINITION_REPRESENTATION ( #722, #636 ) ;
#544 = ORIENTED_EDGE ( 'NONE', *, *, #468, .T. ) ;
#545 = DIRECTION ( 'NONE',  ( 1.000000000000000000, -0.000000000000000000, 0.000000000000000000 ) ) ;
#546 = EDGE_CURVE ( 'NONE', #64, #562, #62, .T. ) ;
#547 = VECTOR ( 'NONE', #459, 1000.000000000000000 ) ;
#548 = ORIENTED_EDGE ( 'NONE', *, *, #582, .F. ) ;
#549 = DIRECTION ( 'NONE',  ( 0.000000000000000000, 0.000000000000000000, 1.000000000000000000 ) ) ;
#550 = VECTOR ( 'NONE', #201, 1000.000000000000000 ) ;
#551 = CARTESIAN_POINT ( 'NONE',  ( -22.71571906354514425, 8.000000000000000000, 22.90635451505016817 ) ) ;
#552 = DIRECTION ( 'NONE',  ( 0.000000000000000000, 1.000000000000000000, -0.000000000000000000 ) ) ;
#553 = ORIENTED_EDGE ( 'NONE', *, *, #560, .F. ) ;
#554 = LINE ( 'NONE', #683, #2 ) ;
#555 = CARTESIAN_POINT ( 'NONE',  ( 57.78428093645484864, 8.099999999999999645, 0.9763545150501696801 ) ) ;
#556 = EDGE_LOOP ( 'NONE', ( #642, #230, #50, #538 ) ) ;
#557 = ORIENTED_EDGE ( 'NONE', *, *, #546, .F. ) ;
#558 = DIRECTION ( 'NONE',  ( -0.000000000000000000, -1.000000000000000000, -0.000000000000000000 ) ) ;
#559 = CARTESIAN_POINT ( 'NONE',  ( 4.784280936454849531, 8.000000000000000000, 5.346354515050169454 ) ) ;
#560 = EDGE_CURVE ( 'NONE', #618, #414, #5, .T. ) ;
#561 = EDGE_CURVE ( 'NONE', #725, #355, #427, .T. ) ;
#562 = VERTEX_POINT ( 'NONE', #660 ) ;
#563 = AXIS2_PLACEMENT_3D ( 'NONE', #271, #650, #219 ) ;
#564 = CARTESIAN_POINT ( 'NONE',  ( 57.78428093645484864, 8.099999999999999645, 5.946354515050169098 ) ) ;
#565 = CARTESIAN_POINT ( 'NONE',  ( -22.71571906354515136, 8.000000000000000000, -16.09364548494983183 ) ) ;
#566 = LINE ( 'NONE', #390, #687 ) ;
#567 = VECTOR ( 'NONE', #290, 1000.000000000000000 ) ;
#568 = ORIENTED_EDGE ( 'NONE', *, *, #603, .F. ) ;
#569 = FACE_OUTER_BOUND ( 'NONE', #254, .T. ) ;
#570 = DIRECTION ( 'NONE',  ( -0.000000000000000000, -1.000000000000000000, -0.000000000000000000 ) ) ;
#571 = CARTESIAN_POINT ( 'NONE',  ( 4.784280936454850419, 8.099999999999999645, 10.31635451505017009 ) ) ;
#572 = EDGE_LOOP ( 'NONE', ( #132, #185, #122, #581 ) ) ;
#573 = ORIENTED_EDGE ( 'NONE', *, *, #13, .F. ) ;
#574 = CARTESIAN_POINT ( 'NONE',  ( 4.784280936454850419, 8.000000000000000000, 10.31635451505017009 ) ) ;
#575 = AXIS2_PLACEMENT_3D ( 'NONE', #600, #168, #478 ) ;
#576 = CARTESIAN_POINT ( 'NONE',  ( 4.784280936454847755, 8.099999999999999645, -4.593645484949830049 ) ) ;
#577 = ORIENTED_EDGE ( 'NONE', *, *, #175, .T. ) ;
#578 = PRESENTATION_LAYER_ASSIGNMENT (  '', '', ( #606 ) ) ;
#579 = CARTESIAN_POINT ( 'NONE',  ( -22.71571906354515136, 0.000000000000000000, -16.09364548494983183 ) ) ;
#580 = PLANE ( 'NONE',  #4 ) ;
#581 = ORIENTED_EDGE ( 'NONE', *, *, #151, .F. ) ;
#582 = EDGE_CURVE ( 'NONE', #723, #601, #610, .T. ) ;
#583 = DIRECTION ( 'NONE',  ( -0.000000000000000000, -1.000000000000000000, -0.000000000000000000 ) ) ;
#584 = CARTESIAN_POINT ( 'NONE',  ( 0.000000000000000000, 8.099999999999999645, -3.393645484949830315 ) ) ;
#585 = DIRECTION ( 'NONE',  ( 0.000000000000000000, 0.000000000000000000, 1.000000000000000000 ) ) ;
#586 = VERTEX_POINT ( 'NONE', #110 ) ;
#587 = CIRCLE ( 'NONE', #235, 0.6000000000000007550 ) ;
#588 = CARTESIAN_POINT ( 'NONE',  ( 57.78428093645484864, 8.099999999999999645, 0.9763545150501696801 ) ) ;
#589 = FACE_OUTER_BOUND ( 'NONE', #572, .T. ) ;
#590 = AXIS2_PLACEMENT_3D ( 'NONE', #86, #399, #585 ) ;
#591 = DIRECTION ( 'NONE',  ( -1.000000000000000000, 0.000000000000000000, -0.000000000000000000 ) ) ;
#592 = ADVANCED_FACE ( 'NONE', ( #231 ), #51, .T. ) ;
#593 = EDGE_CURVE ( 'NONE', #467, #742, #114, .T. ) ;
#594 = DIRECTION ( 'NONE',  ( 1.000000000000000000, -0.000000000000000000, 0.000000000000000000 ) ) ;
#595 = CYLINDRICAL_SURFACE ( 'NONE', #277, 0.5999999999999998668 ) ;
#596 = VECTOR ( 'NONE', #536, 1000.000000000000000 ) ;
#597 = ORIENTED_EDGE ( 'NONE', *, *, #76, .F. ) ;
#598 = DIRECTION ( 'NONE',  ( 1.000000000000000000, -0.000000000000000000, 0.000000000000000000 ) ) ;
#599 = PRODUCT_RELATED_PRODUCT_CATEGORY ( 'part', '', ( #476 ) ) ;
#600 = CARTESIAN_POINT ( 'NONE',  ( 0.000000000000000000, 0.000000000000000000, 0.000000000000000000 ) ) ;
#601 = VERTEX_POINT ( 'NONE', #727 ) ;
#602 = PLANE ( 'NONE',  #328 ) ;
#603 = EDGE_CURVE ( 'NONE', #325, #78, #178, .T. ) ;
#604 = ORIENTED_EDGE ( 'NONE', *, *, #56, .F. ) ;
#605 = LINE ( 'NONE', #494, #782 ) ;
#606 = STYLED_ITEM ( 'NONE', ( #721 ), #435 ) ;
#607 = VERTEX_POINT ( 'NONE', #18 ) ;
#608 = DIRECTION ( 'NONE',  ( 0.000000000000000000, 1.000000000000000000, 0.000000000000000000 ) ) ;
#609 = CIRCLE ( 'NONE', #236, 0.6000000000000003109 ) ;
#610 = LINE ( 'NONE', #487, #567 ) ;
#611 = VECTOR ( 'NONE', #654, 1000.000000000000000 ) ;
#612 = ADVANCED_FACE ( 'NONE', ( #498, #14, #74, #135, #735 ), #318, .T. ) ;
#613 = CARTESIAN_POINT ( 'NONE',  ( 57.78428093645484864, 8.000000000000000000, -3.993645484949829960 ) ) ;
#614 = ORIENTED_EDGE ( 'NONE', *, *, #484, .F. ) ;
#615 = ORIENTED_EDGE ( 'NONE', *, *, #401, .F. ) ;
#616 = DIRECTION ( 'NONE',  ( 0.000000000000000000, 0.000000000000000000, -1.000000000000000000 ) ) ;
#617 = CARTESIAN_POINT ( 'NONE',  ( 76.28428093645484864, 0.000000000000000000, 22.90635451505016817 ) ) ;
#618 = VERTEX_POINT ( 'NONE', #559 ) ;
#619 = ORIENTED_EDGE ( 'NONE', *, *, #706, .F. ) ;
#620 = CARTESIAN_POINT ( 'NONE',  ( 57.78428093645484864, 8.000000000000000000, 1.576354515050169880 ) ) ;
#621 = DIRECTION ( 'NONE',  ( 0.000000000000000000, 0.000000000000000000, -1.000000000000000000 ) ) ;
#622 = AXIS2_PLACEMENT_3D ( 'NONE', #220, #111, #283 ) ;
#623 = ORIENTED_EDGE ( 'NONE', *, *, #468, .F. ) ;
#624 = CARTESIAN_POINT ( 'NONE',  ( -22.71571906354515136, 0.000000000000000000, -16.09364548494983183 ) ) ;
#625 = EDGE_CURVE ( 'NONE', #305, #479, #382, .T. ) ;
#626 = DIRECTION ( 'NONE',  ( -0.000000000000000000, -1.000000000000000000, -0.000000000000000000 ) ) ;
#627 = LINE ( 'NONE', #523, #550 ) ;
#628 = ORIENTED_EDGE ( 'NONE', *, *, #308, .F. ) ;
#629 =( GEOMETRIC_REPRESENTATION_CONTEXT ( 3 ) GLOBAL_UNCERTAINTY_ASSIGNED_CONTEXT ( ( #491 ) ) GLOBAL_UNIT_ASSIGNED_CONTEXT ( ( #85, #393, #327 ) ) REPRESENTATION_CONTEXT ( 'NONE', 'WORKASPACE' ) );
#630 = LINE ( 'NONE', #507, #73 ) ;
#631 = DIRECTION ( 'NONE',  ( 0.000000000000000000, 1.000000000000000000, 0.000000000000000000 ) ) ;
#632 = CARTESIAN_POINT ( 'NONE',  ( 4.784280936454849531, 8.099999999999999645, 5.346354515050169454 ) ) ;
#633 = ORIENTED_EDGE ( 'NONE', *, *, #706, .T. ) ;
#634 = AXIS2_PLACEMENT_3D ( 'NONE', #555, #189, #621 ) ;
#635 = EDGE_LOOP ( 'NONE', ( #553, #211, #496, #386 ) ) ;
#636 = ADVANCED_BREP_SHAPE_REPRESENTATION ( '2018-08-03 device mold channels 100�m', ( #435, #575 ), #215 ) ;
#637 = FACE_OUTER_BOUND ( 'NONE', #400, .T. ) ;
#638 = ORIENTED_EDGE ( 'NONE', *, *, #384, .T. ) ;
#639 = DIRECTION ( 'NONE',  ( 0.000000000000000000, 1.000000000000000000, 0.000000000000000000 ) ) ;
#640 = CARTESIAN_POINT ( 'NONE',  ( 57.78428093645484864, 8.099999999999999645, 10.91635451505016974 ) ) ;
#641 = CARTESIAN_POINT ( 'NONE',  ( 57.78428093645484864, 8.099999999999999645, 5.346354515050169454 ) ) ;
#642 = ORIENTED_EDGE ( 'NONE', *, *, #625, .T. ) ;
#643 = AXIS2_PLACEMENT_3D ( 'NONE', #361, #490, #786 ) ;
#644 = CARTESIAN_POINT ( 'NONE',  ( 8.842641718568953798E-16, 8.000000000000000000, 1.576354515050169436 ) ) ;
#645 = CARTESIAN_POINT ( 'NONE',  ( 4.784280936454847755, 8.000000000000000000, -4.593645484949830049 ) ) ;
#646 = DIRECTION ( 'NONE',  ( -0.000000000000000000, -1.000000000000000000, -0.000000000000000000 ) ) ;
#647 = ORIENTED_EDGE ( 'NONE', *, *, #432, .F. ) ;
#648 = CIRCLE ( 'NONE', #713, 0.5999999999999998668 ) ;
#649 = LINE ( 'NONE', #531, #166 ) ;
#650 = DIRECTION ( 'NONE',  ( -1.000000000000000000, 0.000000000000000000, 0.000000000000000000 ) ) ;
#651 = ADVANCED_FACE ( 'NONE', ( #750 ), #140, .T. ) ;
#652 = ORIENTED_EDGE ( 'NONE', *, *, #734, .T. ) ;
#653 = AXIS2_PLACEMENT_3D ( 'NONE', #377, #27, #502 ) ;
#654 = DIRECTION ( 'NONE',  ( 1.000000000000000000, -0.000000000000000000, 0.000000000000000000 ) ) ;
#655 = VECTOR ( 'NONE', #746, 1000.000000000000000 ) ;
#656 = ORIENTED_EDGE ( 'NONE', *, *, #561, .F. ) ;
#657 = CARTESIAN_POINT ( 'NONE',  ( -22.71571906354514425, 8.000000000000000000, 22.90635451505016817 ) ) ;
#658 = EDGE_CURVE ( 'NONE', #562, #117, #194, .T. ) ;
#659 = EDGE_LOOP ( 'NONE', ( #32, #65, #144, #628 ) ) ;
#660 = CARTESIAN_POINT ( 'NONE',  ( 57.78428093645484864, 8.099999999999999645, 0.3763545150501698133 ) ) ;
#661 = DIRECTION ( 'NONE',  ( -0.000000000000000000, -1.000000000000000000, -0.000000000000000000 ) ) ;
#662 = EDGE_CURVE ( 'NONE', #355, #285, #252, .T. ) ;
#663 = ORIENTED_EDGE ( 'NONE', *, *, #116, .F. ) ;
#664 = CARTESIAN_POINT ( 'NONE',  ( 57.78428093645484864, 8.000000000000000000, 0.9763545150501696801 ) ) ;
#665 = ADVANCED_FACE ( 'NONE', ( #503 ), #739, .T. ) ;
#666 = ORIENTED_EDGE ( 'NONE', *, *, #676, .T. ) ;
#667 = CARTESIAN_POINT ( 'NONE',  ( 1.768528343713790760E-15, 8.099999999999999645, 5.346354515050169454 ) ) ;
#668 = EDGE_CURVE ( 'NONE', #618, #375, #648, .T. ) ;
#669 = CARTESIAN_POINT ( 'NONE',  ( 8.842641718568953798E-16, 8.099999999999999645, 0.3763545150501698133 ) ) ;
#670 = EDGE_CURVE ( 'NONE', #263, #414, #430, .T. ) ;
#671 = AXIS2_PLACEMENT_3D ( 'NONE', #243, #55, #286 ) ;
#672 = CARTESIAN_POINT ( 'NONE',  ( 4.784280936454847755, 8.099999999999999645, -3.993645484949829960 ) ) ;
#673 = CYLINDRICAL_SURFACE ( 'NONE', #684, 0.5999999999999998668 ) ;
#674 = CARTESIAN_POINT ( 'NONE',  ( 0.000000000000000000, 8.099999999999999645, 0.000000000000000000 ) ) ;
#675 = ORIENTED_EDGE ( 'NONE', *, *, #25, .F. ) ;
#676 = EDGE_CURVE ( 'NONE', #64, #764, #119, .T. ) ;
#677 = ORIENTED_EDGE ( 'NONE', *, *, #582, .T. ) ;
#678 = CARTESIAN_POINT ( 'NONE',  ( 57.78428093645484864, 8.099999999999999645, 11.51635451505017116 ) ) ;
#679 = CARTESIAN_POINT ( 'NONE',  ( 57.78428093645484864, 8.099999999999999645, 10.91635451505016974 ) ) ;
#680 = ORIENTED_EDGE ( 'NONE', *, *, #729, .T. ) ;
#681 = ADVANCED_FACE ( 'NONE', ( #441 ), #184, .T. ) ;
#682 = VERTEX_POINT ( 'NONE', #617 ) ;
#683 = CARTESIAN_POINT ( 'NONE',  ( 57.78428093645484864, 8.099999999999999645, -3.393645484949830315 ) ) ;
#684 = AXIS2_PLACEMENT_3D ( 'NONE', #123, #365, #616 ) ;
#685 = DIRECTION ( 'NONE',  ( 0.000000000000000000, 0.000000000000000000, 1.000000000000000000 ) ) ;
#686 = DIRECTION ( 'NONE',  ( 0.000000000000000000, 0.000000000000000000, 1.000000000000000000 ) ) ;
#687 = VECTOR ( 'NONE', #28, 1000.000000000000000 ) ;
#688 = ORIENTED_EDGE ( 'NONE', *, *, #240, .F. ) ;
#689 = CARTESIAN_POINT ( 'NONE',  ( 57.78428093645484864, 8.099999999999999645, -3.993645484949829960 ) ) ;
#690 = DIRECTION ( 'NONE',  ( 0.000000000000000000, 0.000000000000000000, 1.000000000000000000 ) ) ;
#691 = CARTESIAN_POINT ( 'NONE',  ( -22.71571906354515136, 8.000000000000000000, -16.09364548494983183 ) ) ;
#692 = ORIENTED_EDGE ( 'NONE', *, *, #25, .T. ) ;
#693 = AXIS2_PLACEMENT_3D ( 'NONE', #674, #744, #70 ) ;
#694 = DIRECTION ( 'NONE',  ( 0.000000000000000000, 0.000000000000000000, -1.000000000000000000 ) ) ;
#695 = DIRECTION ( 'NONE',  ( 1.000000000000000000, -0.000000000000000000, 0.000000000000000000 ) ) ;
#696 = CARTESIAN_POINT ( 'NONE',  ( 4.784280936454849531, 8.000000000000000000, 6.546354515050168743 ) ) ;
#697 = ORIENTED_EDGE ( 'NONE', *, *, #734, .F. ) ;
#698 = FACE_OUTER_BOUND ( 'NONE', #269, .T. ) ;
#699 = CARTESIAN_POINT ( 'NONE',  ( 76.28428093645484864, 8.000000000000000000, 22.90635451505016817 ) ) ;
#700 = DIRECTION ( 'NONE',  ( -0.000000000000000000, -0.000000000000000000, -1.000000000000000000 ) ) ;
#701 = ORIENTED_EDGE ( 'NONE', *, *, #662, .F. ) ;
#702 = CARTESIAN_POINT ( 'NONE',  ( -22.71571906354514425, 0.000000000000000000, 22.90635451505016817 ) ) ;
#703 = DIRECTION ( 'NONE',  ( 0.000000000000000000, 0.000000000000000000, 1.000000000000000000 ) ) ;
#704 = DIRECTION ( 'NONE',  ( 0.000000000000000000, 0.000000000000000000, -1.000000000000000000 ) ) ;
#705 = ORIENTED_EDGE ( 'NONE', *, *, #421, .T. ) ;
#706 = EDGE_CURVE ( 'NONE', #451, #249, #309, .T. ) ;
#707 =( GEOMETRIC_REPRESENTATION_CONTEXT ( 3 ) GLOBAL_UNCERTAINTY_ASSIGNED_CONTEXT ( ( #10 ) ) GLOBAL_UNIT_ASSIGNED_CONTEXT ( ( #767, #477, #347 ) ) REPRESENTATION_CONTEXT ( 'NONE', 'WORKASPACE' ) );
#708 = DIRECTION ( 'NONE',  ( 0.000000000000000000, 0.000000000000000000, -1.000000000000000000 ) ) ;
#709 = DIRECTION ( 'NONE',  ( 0.000000000000000000, 1.000000000000000000, 0.000000000000000000 ) ) ;
#710 = EDGE_CURVE ( 'NONE', #730, #263, #354, .T. ) ;
#711 = LINE ( 'NONE', #343, #52 ) ;
#712 = ORIENTED_EDGE ( 'NONE', *, *, #76, .T. ) ;
#713 = AXIS2_PLACEMENT_3D ( 'NONE', #312, #449, #685 ) ;
#714 = DIRECTION ( 'NONE',  ( 0.000000000000000000, 1.000000000000000000, 0.000000000000000000 ) ) ;
#715 = AXIS2_PLACEMENT_3D ( 'NONE', #513, #440, #246 ) ;
#716 = PLANE ( 'NONE',  #196 ) ;
#717 = ORIENTED_EDGE ( 'NONE', *, *, #593, .F. ) ;
#718 = CARTESIAN_POINT ( 'NONE',  ( 2.652792515570686632E-15, 8.099999999999999645, 10.31635451505017009 ) ) ;
#719 = AXIS2_PLACEMENT_3D ( 'NONE', #349, #242, #63 ) ;
#720 = ORIENTED_EDGE ( 'NONE', *, *, #504, .F. ) ;
#721 = PRESENTATION_STYLE_ASSIGNMENT (( #405 ) ) ;
#722 = PRODUCT_DEFINITION_SHAPE ( 'NONE', 'NONE',  #225 ) ;
#723 = VERTEX_POINT ( 'NONE', #574 ) ;
#724 = DIRECTION ( 'NONE',  ( -0.000000000000000000, -1.000000000000000000, -0.000000000000000000 ) ) ;
#725 = VERTEX_POINT ( 'NONE', #645 ) ;
#726 = VECTOR ( 'NONE', #170, 1000.000000000000000 ) ;
#727 = CARTESIAN_POINT ( 'NONE',  ( 57.78428093645484864, 8.000000000000000000, 10.31635451505017009 ) ) ;
#728 = EDGE_CURVE ( 'NONE', #36, #346, #772, .T. ) ;
#729 = EDGE_CURVE ( 'NONE', #248, #682, #30, .T. ) ;
#730 = VERTEX_POINT ( 'NONE', #99 ) ;
#731 = CARTESIAN_POINT ( 'NONE',  ( 76.28428093645484864, 8.000000000000000000, 22.90635451505016817 ) ) ;
#732 = COLOUR_RGB ( '',1.000000000000000000, 1.000000000000000000, 1.000000000000000000 ) ;
#733 = CARTESIAN_POINT ( 'NONE',  ( 4.784280936454850419, 8.099999999999999645, 10.31635451505017009 ) ) ;
#734 = EDGE_CURVE ( 'NONE', #16, #742, #241, .T. ) ;
#735 = FACE_BOUND ( 'NONE', #58, .T. ) ;
#736 = EDGE_LOOP ( 'NONE', ( #127, #474, #260, #41 ) ) ;
#737 = ORIENTED_EDGE ( 'NONE', *, *, #401, .T. ) ;
#738 = CARTESIAN_POINT ( 'NONE',  ( 4.784280936454848643, 8.000000000000000000, 1.576354515050169436 ) ) ;
#739 = CYLINDRICAL_SURFACE ( 'NONE', #634, 0.6000000000000004219 ) ;
#740 = ORIENTED_EDGE ( 'NONE', *, *, #710, .T. ) ;
#741 = ADVANCED_FACE ( 'NONE', ( #762 ), #94, .F. ) ;
#742 = VERTEX_POINT ( 'NONE', #338 ) ;
#743 = DIRECTION ( 'NONE',  ( -0.000000000000000000, -1.000000000000000000, -0.000000000000000000 ) ) ;
#744 = DIRECTION ( 'NONE',  ( 0.000000000000000000, 1.000000000000000000, -0.000000000000000000 ) ) ;
#745 = VECTOR ( 'NONE', #120, 1000.000000000000000 ) ;
#746 = DIRECTION ( 'NONE',  ( -0.000000000000000000, -1.000000000000000000, -0.000000000000000000 ) ) ;
#747 = ORIENTED_EDGE ( 'NONE', *, *, #217, .T. ) ;
#748 = FACE_OUTER_BOUND ( 'NONE', #330, .T. ) ;
#749 = VECTOR ( 'NONE', #278, 1000.000000000000000 ) ;
#750 = FACE_OUTER_BOUND ( 'NONE', #226, .T. ) ;
#751 = PLANE ( 'NONE',  #590 ) ;
#752 = VECTOR ( 'NONE', #324, 1000.000000000000000 ) ;
#753 = ORIENTED_EDGE ( 'NONE', *, *, #356, .F. ) ;
#754 = LINE ( 'NONE', #624, #60 ) ;
#755 = EDGE_CURVE ( 'NONE', #64, #83, #526, .T. ) ;
#756 = CARTESIAN_POINT ( 'NONE',  ( -22.71571906354514425, 8.000000000000000000, 22.90635451505016817 ) ) ;
#757 = VERTEX_POINT ( 'NONE', #699 ) ;
#758 =( NAMED_UNIT ( * ) PLANE_ANGLE_UNIT ( ) SI_UNIT ( $, .RADIAN. ) );
#759 = FACE_OUTER_BOUND ( 'NONE', #26, .T. ) ;
#760 = ORIENTED_EDGE ( 'NONE', *, *, #728, .F. ) ;
#761 = DIRECTION ( 'NONE',  ( 0.000000000000000000, 0.000000000000000000, 1.000000000000000000 ) ) ;
#762 = FACE_OUTER_BOUND ( 'NONE', #434, .T. ) ;
#763 = DIRECTION ( 'NONE',  ( -1.000000000000000000, 0.000000000000000000, -0.000000000000000000 ) ) ;
#764 = VERTEX_POINT ( 'NONE', #267 ) ;
#765 = CARTESIAN_POINT ( 'NONE',  ( 4.784280936454847755, 8.099999999999999645, -3.393645484949830315 ) ) ;
#766 =( LENGTH_UNIT ( ) NAMED_UNIT ( * ) SI_UNIT ( .MILLI., .METRE. ) );
#767 =( LENGTH_UNIT ( ) NAMED_UNIT ( * ) SI_UNIT ( .MILLI., .METRE. ) );
#768 = ORIENTED_EDGE ( 'NONE', *, *, #301, .F. ) ;
#769 = VECTOR ( 'NONE', #255, 1000.000000000000000 ) ;
#770 = ADVANCED_FACE ( 'NONE', ( #589 ), #595, .T. ) ;
#771 = CARTESIAN_POINT ( 'NONE',  ( 76.28428093645484864, 8.000000000000000000, -16.09364548494983183 ) ) ;
#772 = LINE ( 'NONE', #584, #143 ) ;
#773 = STYLED_ITEM ( 'NONE', ( #342 ), #636 ) ;
#774 = FACE_OUTER_BOUND ( 'NONE', #126, .T. ) ;
#775 = AXIS2_PLACEMENT_3D ( 'NONE', #80, #257, #366 ) ;
#776 = CARTESIAN_POINT ( 'NONE',  ( 8.842641718568953798E-16, 8.099999999999999645, 1.576354515050169436 ) ) ;
#777 = DIRECTION ( 'NONE',  ( -0.000000000000000000, -1.000000000000000000, -0.000000000000000000 ) ) ;
#778 = ORIENTED_EDGE ( 'NONE', *, *, #116, .T. ) ;
#779 = FILL_AREA_STYLE ('',( #159 ) ) ;
#780 = ORIENTED_EDGE ( 'NONE', *, *, #239, .T. ) ;
#781 = FACE_OUTER_BOUND ( 'NONE', #19, .T. ) ;
#782 = VECTOR ( 'NONE', #6, 1000.000000000000000 ) ;
#783 = ORIENTED_EDGE ( 'NONE', *, *, #432, .T. ) ;
#784 = CARTESIAN_POINT ( 'NONE',  ( 2.652792515570686632E-15, 8.099999999999999645, 10.31635451505017009 ) ) ;
#785 = ORIENTED_EDGE ( 'NONE', *, *, #358, .F. ) ;
#786 = DIRECTION ( 'NONE',  ( 0.000000000000000000, 0.000000000000000000, 1.000000000000000000 ) ) ;
ENDSEC;
END-ISO-10303-21;
